# Supplementary material for: Grade 3–4 Immune-Related Adverse Events Induced by Immune Checkpoint Inhibitors in Non-Small-Cell Lung Cancer (NSCLC) Patients Are Correlated with Better Outcome: A Real-Life Observational Study
Source: MDPI journal article supplement (doi:10.3390/cancers14163878), 2022-08-11
Supplement: s1 [file s1]

**Supplementary Figure S1: TTNT in the entire population**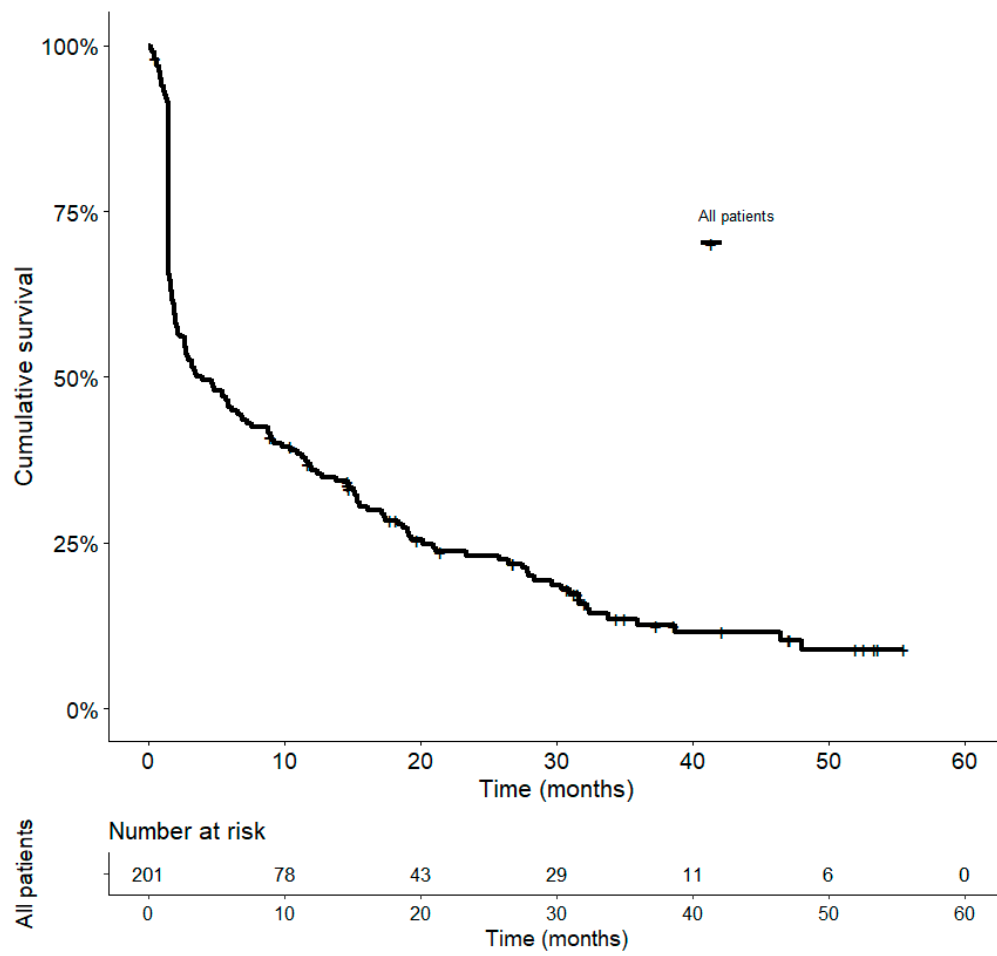

**Supplementary Figure S2: TTNT according to treatment with antibiotics (A), corticosteroids (B), and LIPI score (C).**

**Suppl. Fig. S2A:**

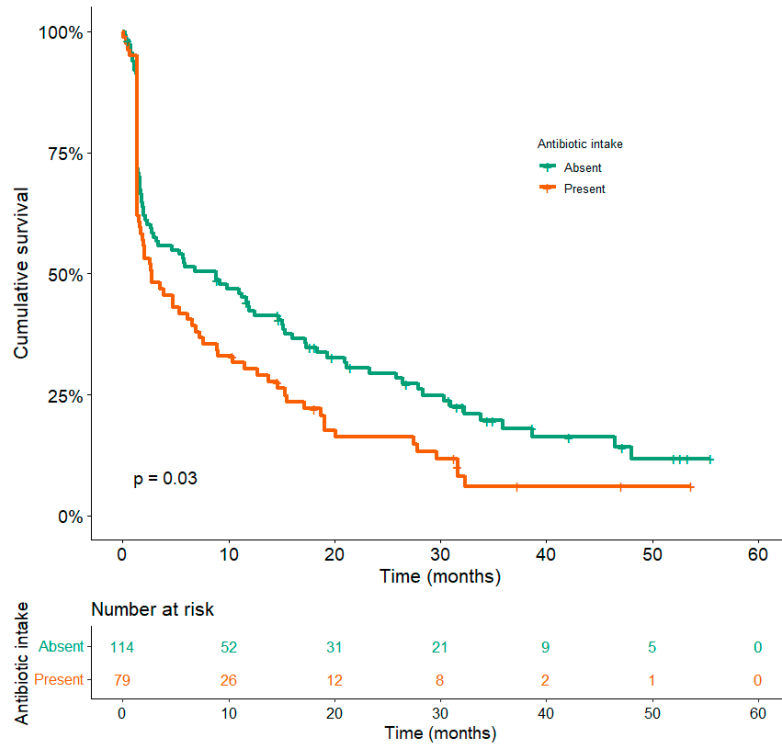

**Suppl. Fig. S2B:**

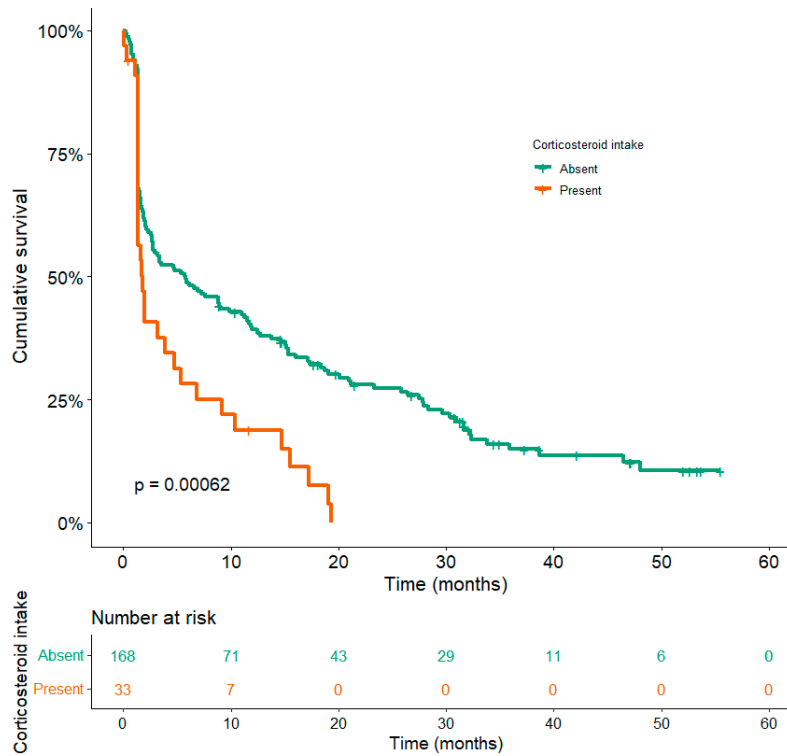

Suppl. Fig. S2C:

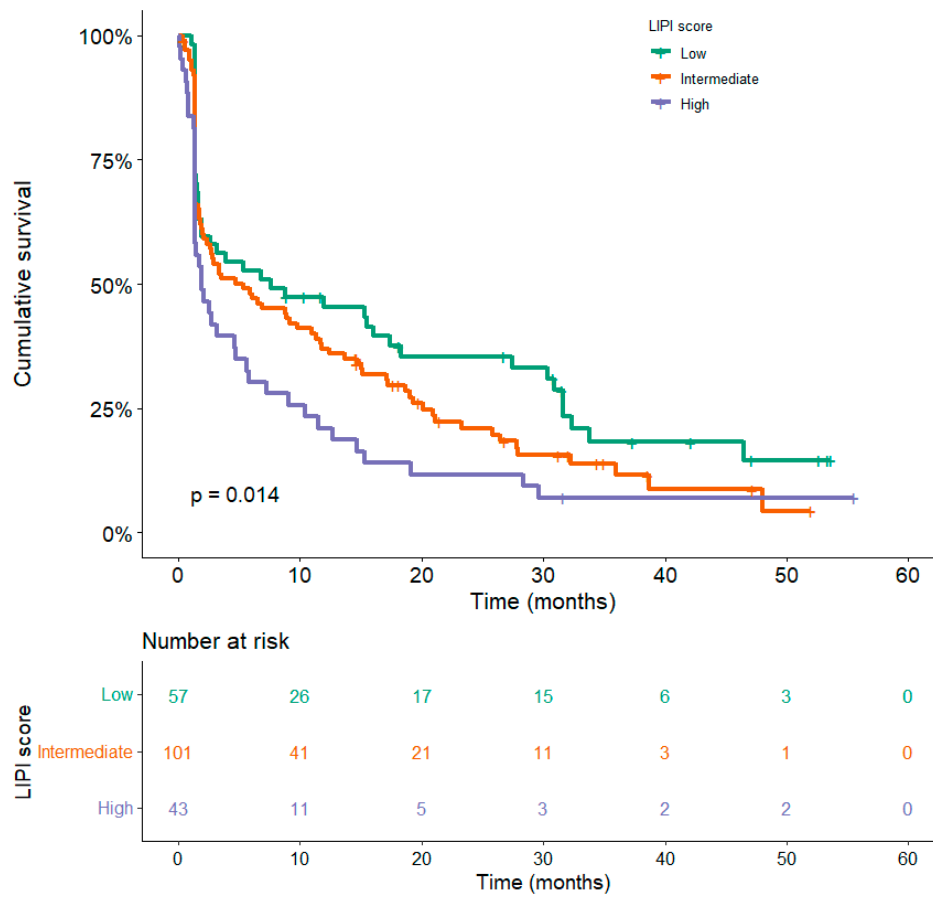

**Supplementary Table S1** - Comparison of patients with Grade 3-4 immune-related adverse events with patients without Grade 3-4 irAEs

| Variables                                                                                                           | N   | All patients<br>(% of all patients)         | N     | Grade 3-4 irAEs                             |                                           | p    |
|---------------------------------------------------------------------------------------------------------------------|-----|---------------------------------------------|-------|---------------------------------------------|-------------------------------------------|------|
|                                                                                                                     |     |                                             |       | No<br>(% of patients in each variable)      | Yes<br>(% of patients in each variable)   |      |
| <b>Age at ICI initiation (years)</b><br><b>Mean (SD)</b><br><b>Median (IQR)</b>                                     | 201 | 63.3 (10.4)<br>64 (57 - 71)                 | 201   | 62.9 (SD: 10.7)<br>63 (IQR: 56-70.5)        | 64.9 (SD: 9.4)<br>66.5 (IQR: 61-72)       | 0.24 |
| <b>Gender</b><br><b>Male</b><br><b>Female</b>                                                                       | 201 | 130 (65)<br>69 (35)                         | 201   | 110 (84.5.)<br>55 (80)                      | 22 (17)<br>14 (20.5)                      | 0.57 |
| <b>Healthcare center</b><br><b>Bichat – Claude Bernard AP-HP</b><br><b>S<sup>t</sup> Joseph Foundation Hospital</b> | 201 | 162 (80.5)<br>39 (19.5)                     | 201   | 131 (81)<br>34 (87)                         | 31 (19.5)<br>5 (13)                       | 0.37 |
| <b>Smoking status</b><br><b>Never-smokers</b><br><b>Former smokers</b><br><b>Smokers</b>                            | 201 | 11 (5)<br>90 (45)<br>100 (50)               | 201   | 8 (73.0)<br>74 (82)<br>83 (83)              | 3 (27.5)<br>16 (18)<br>17 (17)            | 0.65 |
| <b>Histology</b><br><b>Squamous cell carcinoma</b><br><b>Non-squamous cell carcinoma</b>                            | 201 | 55 (27.5)<br>146 (72.5)                     | 201   | 48 (87.5)<br>117 (80)                       | 7 (13)<br>29 (20)                         | 0.30 |
| <b>Performance status</b><br><b>0</b><br><b>1</b><br><b>2</b><br><b>3</b>                                           | 201 | 27 (13.5)<br>94 (47)<br>69 (34)<br>11 (5.5) | 199** | 21 (78)<br>76 (81)<br>57 (82.5)<br>11 (100) | 6 (22)<br>18 (19.5)<br>12 (17.5)<br>0 (0) | 0.45 |
| <b>Metastatic sites count</b><br><b>&lt; 3</b><br><b>≥ 3</b>                                                        | 201 | 102 (51.0)<br>99 (49.0)                     | 199** | 83 (81.5)<br>82 (83)                        | 19 (19)<br>17 (17.5)                      | 0.85 |
| <b>Brain metastasis</b><br><b>No</b><br><b>Yes</b>                                                                  | 201 | 136 (68.0)<br>65 (32.0)                     | 199** | 108 (79.5)<br>57 (88)                       | 28 (21)<br>8 (12.5)                       | 0.17 |
| <b>Liver metastasis</b><br><b>No</b><br><b>Yes</b>                                                                  | 201 | 168 (84.0)<br>33 (16.0)                     | 199** | 134 (80)<br>31 (94)                         | 34 (20.5)<br>2 (6)                        | 0.08 |

|                                        |     |            |                    |           |           |              |
|----------------------------------------|-----|------------|--------------------|-----------|-----------|--------------|
| <b>Disease stage at ICI initiation</b> |     |            |                    |           |           |              |
| <b>Non metastatic</b>                  | 201 | 25 (12.5)  | 199**              | 19 (76)   | 6 (24)    | 0.41         |
| <b>Metastatic</b>                      |     | 176 (87.5) |                    | 146 (83)  | 30 (17)   |              |
| <b>History of CRD</b>                  |     |            |                    |           |           |              |
| <b>No</b>                              | 192 | 131 (68.0) | 191 <sup>#</sup>   | 107 (82)  | 24 (18.5) | 1.00         |
| <b>Yes</b>                             |     | 61 (32.0)  |                    | 50 (82)   | 11 (18.5) |              |
| <b>History of CVD</b>                  |     |            |                    |           |           |              |
| <b>No</b>                              | 195 | 94 (48.2)  | 194 <sup>##</sup>  | 82 (87)   | 12 (13)   | 0.06         |
| <b>Yes</b>                             |     | 101 (51.8) |                    | 77 (76)   | 24 (24)   |              |
| <b>PPI intake*</b>                     |     |            |                    |           |           |              |
| <b>No</b>                              | 182 | 109 (59.9) | 181 <sup>‡</sup>   | 94 (86)   | 15 (14)   | <b>0.034</b> |
| <b>Yes</b>                             |     | 73 (40.1)  |                    | 53 (72.5) | 20 (27.5) |              |
| <b>Corticosteroids intake*</b>         |     |            |                    |           |           |              |
| <b>No</b>                              | 201 | 168 (83.6) | 199**              | 136 (81)  | 32 (19)   | 0.46         |
| <b>Yes</b>                             |     | 33 (16.4)  |                    | 29 (88)   | 4 (12.5)  |              |
| <b>Antibiotics intake*</b>             |     |            |                    |           |           |              |
| <b>No</b>                              | 193 | 114 (59.1) | 192 <sup>††</sup>  | 93 (81.5) | 21 (18.5) | 1.00         |
| <b>Yes</b>                             |     | 79 (40.9)  |                    | 64 (81)   | 15 (19)   |              |
| <b>ICI sequence</b>                    |     |            |                    |           |           |              |
| <b>First-line</b>                      | 201 | 61 (30.3)  | 199**              | 49 (80.5) | 12 (20)   | 0.84         |
| <b>Following chemotherapy</b>          |     | 140 (69.7) |                    | 116 (83)  | 24 (17.5) |              |
| <b>ICI type</b>                        |     |            |                    |           |           |              |
| <b>Nivolumab</b>                       | 201 | 138 (68.7) | 199**              | 116 (84)  | 22 (16)   | <b>0.023</b> |
| <b>Pembrolizumab</b>                   |     | 51 (25.4)  |                    | 43 (84.5) | 8 (16)    |              |
| <b>Nivolumab + Ipilimumab</b>          |     | 12 (6.0)   |                    | 6 (50)    | 6 (50)    |              |
| <b>PD-L1 TPS</b>                       |     |            |                    |           |           |              |
| <b>&lt;1 %</b>                         |     | 33 (20.9)  |                    | 31 (94)   | 2 (6)     | 0.11         |
| <b>1-49 %</b>                          | 158 | 37 (23.4)  | 156 <sup>†††</sup> | 30 (81)   | 7 (20)    |              |
| <b>≥50 %</b>                           |     | 88 (55.7)  |                    | 68 (77.5) | 20 (23)   |              |

SD, standard deviation; IQR, interquartile range; irAEs, immune-related adverse events; ICI, immune checkpoint inhibitor; CRD, chronic respiratory disease; CVD, cardiovascular disease; PPI, proton pump inhibitor; TPS, tumor proportion score.

\* during the month preceding and/or the three first months following the initiation of ICI treatment.

\*\* missing data in 2 patients; <sup>#</sup> missing data in 10 patients; <sup>##</sup> missing data in 7 patients; <sup>‡</sup> missing data in 20 patients

<sup>††</sup>missing data in 9 patients; <sup>†††</sup>missing data in 45 patients

**Supplementary Table S2 – Univariable (~~Kaplan-Meier~~) and multivariable analyses**  
(Cox proportional hazards) for time to new treatment (TTNT)

| Variables                              | N (events) | Univariable analysis |         |                   | Multivariable analysis |         |                   |
|----------------------------------------|------------|----------------------|---------|-------------------|------------------------|---------|-------------------|
|                                        |            | HR                   | 95% CI  | P value           | aHR                    | 95% CI  | P value           |
| <b>Age at ICI initiation (years)</b>   | 201 (169)  |                      |         |                   |                        |         |                   |
| > 65                                   | 91 (75)    | -                    |         | 0.286             |                        |         |                   |
| ≤ 65                                   | 110 (94)   | 1.2                  | 0.9-1.6 |                   |                        |         |                   |
| <b>Gender</b>                          | 201 (169)  |                      |         |                   |                        |         |                   |
| Female                                 | 69 (51)    | -                    |         | <b>0.018</b>      | 1.5                    | 1.1-2.1 | <b>0.020</b>      |
| Male                                   | 132 (118)  | 1.5                  | 1.1-2.1 |                   |                        |         |                   |
| <b>PS at ICI initiation</b>            | 201 (169)  |                      |         |                   |                        |         |                   |
| 0-1                                    | 121 (94)   | -                    |         | <b>&lt;0.0001</b> | 1.5                    | 1.1-2.1 | <b>0.010</b>      |
| ≥ 2                                    | 80 (75)    | 1.9                  | 1.4-2.6 |                   |                        |         |                   |
| <b>Antibiotic intake*</b>              | 193 (161)  |                      |         |                   |                        |         |                   |
| No                                     | 114 (90)   | -                    |         | <b>0.039</b>      | 1.4                    | 1.0-1.9 | 0.062             |
| Yes                                    | 79 (71)    | 1.4                  | 1.0-1.9 |                   |                        |         |                   |
| <b>Corticosteroid intake*</b>          | 201 (169)  |                      |         |                   |                        |         |                   |
| No                                     | 168 (138)  | -                    |         | <b>0.002</b>      | 1.6                    | 1.0-2.4 | <b>0.034</b>      |
| Yes                                    | 33 (31)    | 1.9                  | 1.3-2.8 |                   |                        |         |                   |
| <b>Histological type</b>               | 201 (169)  |                      |         |                   |                        |         |                   |
| Squamous                               | 55 (49)    | -                    |         | 0.597             |                        |         |                   |
| Non-squamous                           | 146 (120)  | 0.9                  | 0.7-1.3 |                   |                        |         |                   |
| <b>Number of metastatic sites</b>      | 201 (169)  |                      |         |                   |                        |         |                   |
| < 3                                    | 102 (78)   | -                    |         | <b>&lt;0.0001</b> | 1.6                    | 1.1-2.2 | <b>0.017</b>      |
| ≥ 3                                    | 99 (91)    | 1.9                  | 1.4-2.6 |                   |                        |         |                   |
| <b>PD-L1 status (TPS)</b>              | 158 (129)  |                      |         | 0.108             |                        |         |                   |
| ≥ 50                                   | 88 (67)    | -                    |         | -                 |                        |         |                   |
| 0                                      | 33 (31)    | 1.5                  | 1.0-2.4 | 0.048             |                        |         |                   |
| 1-49                                   | 37 (31)    | 1.3                  | 0.9-2.0 | 0.189             |                        |         |                   |
| <b>Disease stage at ICI initiation</b> | 201 (169)  |                      |         |                   |                        |         |                   |
| Non metastatic                         | 25 (21)    | -                    |         | 0.133             |                        |         |                   |
| Metastatic                             | 176 (148)  | 1.4                  | 0.9-2.3 |                   |                        |         |                   |
| <b>Brain metastasis</b>                | 201 (169)  |                      |         |                   |                        |         |                   |
| No                                     | 136 (107)  | -                    |         | <b>&lt;0.001</b>  |                        |         |                   |
| Yes                                    | 65 (62)    | 1.8                  | 1.3-2.5 |                   |                        |         |                   |
| <b>Liver metastasis</b>                | 201 (169)  |                      |         |                   |                        |         |                   |
| No                                     | 168 (137)  | -                    |         | <b>&lt;0.0001</b> | 1.9                    | 1.2-2.9 | <b>0.006</b>      |
| Yes                                    | 33 (32)    | 2.4                  | 1.6-3.5 |                   |                        |         |                   |
| <b>ICI sequence</b>                    | 201 (169)  |                      |         |                   |                        |         |                   |
| First-line                             | 61 (49)    | -                    |         | 0.828             |                        |         |                   |
| Following chemotherapy                 | 140 (120)  | 1.0                  | 0.7-1.4 |                   |                        |         |                   |
| <b>ICI type</b>                        | 201 (169)  |                      |         |                   |                        |         |                   |
| Nivolumab and Ipilimumab               | 12 (10)    | -                    |         | 0.328             |                        |         |                   |
| Nivolumab or Pembrolizumab             | 189 (159)  | 1.4                  | 0.7-2.6 |                   |                        |         |                   |
| <b>LIPI score</b>                      | 201 (169)  |                      |         | <b>0.022</b>      |                        |         | <b>0.023</b>      |
| 0                                      | 57 (44)    | -                    |         | -                 | -                      |         | -                 |
| 1                                      | 101 (85)   | 1.3                  | 0.9-1.9 | 0.155             | 1.7                    | 1.1-2.5 | <b>0.010</b>      |
| 2                                      | 43 (40)    | 1.8                  | 1.2-2.8 | <b>0.006</b>      | 1.7                    | 1.1-2.7 | <b>0.023</b>      |
| <b>Grade 3-4 irAEs</b>                 | 201 (169)  |                      |         |                   |                        |         |                   |
| Yes                                    | 36 (25)    | -                    |         | <b>&lt;0.0001</b> | 2.4                    | 1.6-3.8 | <b>&lt;0.0001</b> |
| No                                     | 165 (144)  | 2.4                  | 1.6-3.7 |                   |                        |         |                   |

\* During the month preceding and/or the three first months following the initiation of ICI treatment. 95% CI, 95% confidence interval; aHR, adjusted hazard ratio; HR, hazard ratio; ICI, immune checkpoint inhibitor; irAEs, immune-related adverse events; PD-L1, programmed death ligand 1; PS, performance status, TPS, tumor proportion score; TTNT, time to new treatment.

The multivariable analysis included 193 patients with all available data, accounting for 161 events.

**Supplementary Table S3 – Multivariable analysis by Cox proportional hazards for overall survival (OS), including PD-L1**

| <b>Multivariable analysis</b> (events = 102/151) |            |               |                   |  |
|--------------------------------------------------|------------|---------------|-------------------|--|
| <b>Variables</b>                                 | <b>aHR</b> | <b>95% CI</b> | <b>P value</b>    |  |
| <b>Gender</b>                                    |            |               |                   |  |
| Female                                           | 1.8        | 1.1-2.8       | <b>0.014</b>      |  |
| Male                                             |            |               |                   |  |
| <b>PS at ICI initiation</b>                      |            |               |                   |  |
| 0-1                                              | 1.9        | 1.2-2.9       | <b>0.005</b>      |  |
| ≥ 2                                              |            |               |                   |  |
| <b>Antibiotic intake*</b>                        |            |               |                   |  |
| No                                               | 1.7        | 1.1-2.6       | <b>0.017</b>      |  |
| Yes                                              |            |               |                   |  |
| <b>Corticosteroid intake*</b>                    |            |               |                   |  |
| No                                               | 2.2        | 1.2-3.9       | <b>0.010</b>      |  |
| Yes                                              |            |               |                   |  |
| <b>Number of metastatic sites</b>                |            |               |                   |  |
| < 3                                              | 1.6        | 0.9-2.6       | 0.088             |  |
| ≥ 3                                              |            |               |                   |  |
| <b>Brain metastasis</b>                          |            |               |                   |  |
| No                                               | 1.7        | 1.0-2.9       | <b>0.035</b>      |  |
| Yes                                              |            |               |                   |  |
| <b>Liver metastasis</b>                          |            |               |                   |  |
| No                                               | 2.5        | 1.4-4.2       | <b>0.001</b>      |  |
| Yes                                              |            |               |                   |  |
| <b>LIPI score</b>                                |            |               | <b>&lt;0.001</b>  |  |
| 0                                                | -          |               | -                 |  |
| 1                                                | 3.2        | 1.8-5.6       | <b>&lt;0.0001</b> |  |
| 2                                                | 2.2        | 1.2-4.0       | <b>0.007</b>      |  |
| <b>Grade 3-4 irAEs</b>                           |            |               |                   |  |
| No                                               | 3.4        | 1.9-6.4       | <b>&lt;0.0001</b> |  |
| Yes                                              |            |               |                   |  |

\* During the month preceding and/or the three first months following the initiation of ICI treatment.

95% CI, 95% confidence interval; aHR, adjusted hazard ratio; ICI, immune checkpoint inhibitor; irAEs, immune-related adverse events; PS, performance status.

PD-L1 was included in the modeling procedure, the multivariable analysis including 151 patients with all available data accounting for 102 events. PD-L1 is not retained in the final model. Stage was excluded either from the model since tightly linked to brain, liver and number of metastases variables.
